# Supplementary material for: Flavanones from Erythrina crista-galli Twigs and Their Antioxidant Properties Determined through In Silico and In Vitro Studies
Source: MDPI journal article supplement (doi:10.3390/molecules27186018), 2022-09-15
Supplement: s1 [file s1]

## Supplementary Material for Article:

# Flavanones from *Erythrina crista-galli* Twigs and Their Antioxidant Properties Determined through *In Silico* and *In Vitro* Studies

Vanny Deviani <sup>1</sup>, Ari Hardianto <sup>1</sup>, Kindi Farabi <sup>1</sup> and Tati Herlina <sup>1,\*</sup>

**Table S1.** The XYZ coordinates of all atoms of all structures optimized by the DFT method.

### Lupinifolin (1)

|   |          |          |          |   |          |          |          |
|---|----------|----------|----------|---|----------|----------|----------|
| O | -3.43080 | 0.99250  | -0.79000 | C | 1.78400  | 3.40250  | -0.07780 |
| O | 1.01680  | -0.35870 | -0.30260 | H | 1.76130  | -0.99660 | 1.50430  |
| O | -2.49970 | -3.48280 | 0.65170  | H | 2.42170  | -3.26640 | 0.67410  |
| O | 0.07890  | -4.19700 | 0.74680  | H | 1.94790  | -2.79470 | -0.96140 |
| O | 7.21410  | 0.65540  | -0.77740 | H | 0.22800  | 1.62000  | -1.45580 |
| C | -1.19740 | 0.32230  | -0.53110 | H | -1.44530 | 2.11990  | -1.64280 |
| C | -0.29530 | -0.70040 | -0.20860 | H | -6.38470 | -0.62060 | -0.39040 |
| C | -4.80890 | 0.95580  | -0.30170 | H | -4.85650 | -2.50260 | -0.14200 |
| C | -2.55690 | 0.01640  | -0.44120 | H | -5.16880 | 2.83210  | -1.31900 |
| C | 1.96720  | -1.15700 | 0.43780  | H | -5.54710 | 1.39660  | -2.29240 |
| C | -0.70300 | -2.00370 | 0.18190  | H | -6.63530 | 1.89360  | -0.98060 |
| C | -3.03030 | -1.26110 | -0.07020 | H | -4.20920 | 0.97580  | 1.79060  |
| C | 1.74740  | -2.62590 | 0.10350  | H | -4.45500 | 2.59030  | 1.08570  |
| C | -2.09540 | -2.25140 | 0.26320  | H | -5.84990 | 1.57190  | 1.50100  |
| C | 0.31340  | -3.05360 | 0.39660  | H | -1.51170 | 2.72530  | 0.84680  |
| C | -0.72250 | 1.70700  | -0.93230 | H | 3.90540  | -0.39040 | 2.18580  |
| C | -5.31670 | -0.46440 | -0.28990 | H | 3.12830  | -0.76240 | -2.01730 |
| C | -4.46610 | -1.48860 | -0.14290 | H | -3.46020 | -3.49840 | 0.72280  |
| C | 3.35070  | -0.64680 | 0.12340  | H | 6.20140  | 0.37050  | 1.69760  |
| C | -5.58870 | 1.82420  | -1.28850 | H | 5.42930  | 0.01550  | -2.50720 |
| C | -4.82900 | 1.56310  | 1.10940  | H | -0.61210 | 4.23250  | 2.31270  |
| C | -0.60640 | 2.64490  | 0.24770  | H | 1.12370  | 3.99460  | 2.58540  |
| C | 4.23100  | -0.31380 | 1.15350  | H | 0.57540  | 5.31840  | 1.56830  |
| C | 3.79830  | -0.52400 | -1.19910 | H | 1.84450  | 2.70910  | -0.91540 |
| C | 0.45140  | 3.37670  | 0.62680  | H | 1.99860  | 4.41050  | -0.45390 |
| C | 5.52980  | 0.11830  | 0.88240  | H | 2.59140  | 3.15280  | 0.62050  |
| C | 5.08520  | -0.08500 | -1.48500 | H | 7.72110  | 0.84060  | 0.02050  |
| C | 5.95810  | 0.23370  | -0.44020 |   |          |          |          |
| C | 0.37080  | 4.27490  | 1.83810  |   |          |          |          |

**Citflavanone (2)**

|   |          |          |          |                           |          |          |          |
|---|----------|----------|----------|---------------------------|----------|----------|----------|
| O | 0.62230  | -0.04040 | -0.05620 | H                         | -6.00540 | -2.37080 | -0.58320 |
| O | -4.05300 | -0.69820 | -0.32860 | H                         | -4.81960 | -2.69820 | -1.86360 |
| O | -2.39060 | 3.70810  | 0.01190  | H                         | 3.78350  | 0.52980  | -2.17030 |
| O | 0.27540  | 4.01940  | 0.33070  | H                         | 2.52600  | -0.69240 | 1.74550  |
| O | 6.56380  | -2.08510 | 0.33040  | H                         | 5.90640  | -0.69190 | -1.87420 |
| C | 1.73470  | 0.81680  | -0.40390 | H                         | 4.65330  | -1.93180 | 2.03650  |
| C | -3.94530 | -2.11590 | 0.03370  | H                         | -3.34160 | 3.86530  | -0.02180 |
| C | -0.61710 | 0.51430  | -0.07210 | H                         | 7.14480  | -2.01110 | -0.43440 |
| C | -1.67590 | -0.39930 | -0.17120 |                           |          |          |          |
| C | 1.66470  | 2.08580  | 0.43590  | <b>Lonchocarpol A (3)</b> |          |          |          |
| C | -0.82090 | 1.91520  | 0.01500  | O                         | -1.31030 | -0.26860 | -0.24200 |
| C | -2.98420 | 0.11420  | -0.18850 | O                         | 2.35270  | -3.24890 | 0.57440  |
| C | 0.33180  | 2.80490  | 0.25050  | O                         | 3.04760  | 1.22380  | -1.04660 |
| C | -2.56900 | -2.64530 | -0.29130 | O                         | -0.13930 | -3.90000 | 1.22480  |
| C | -1.50540 | -1.83290 | -0.34680 | O                         | -7.58380 | 0.49670  | -0.19030 |
| C | 3.00470  | 0.02340  | -0.22970 | C                         | -2.22310 | -1.38680 | -0.28650 |
| C | -2.16340 | 2.37640  | -0.04920 | C                         | -1.89190 | -2.33620 | 0.85620  |
| C | -3.22850 | 1.48550  | -0.14850 | C                         | 0.01980  | -0.55830 | -0.21770 |
| C | -4.23930 | -2.23270 | 1.53680  | C                         | 0.50450  | -1.81490 | 0.22810  |
| C | -5.02650 | -2.80650 | -0.79690 | C                         | 0.86590  | 0.47290  | -0.63570 |
| C | 3.96710  | 0.00230  | -1.23980 | C                         | -0.44010 | -2.80030 | 0.79380  |
| C | 3.26620  | -0.68040 | 0.95380  | C                         | 2.78970  | -1.03320 | -0.25310 |
| C | 5.16870  | -0.68800 | -1.07750 | C                         | 1.90720  | -2.03080 | 0.18180  |
| C | 4.45360  | -1.38170 | 1.12500  | C                         | 2.23910  | 0.21000  | -0.62540 |
| C | 5.41250  | -1.38260 | 0.10760  | C                         | -3.63100 | -0.84780 | -0.25880 |
| H | 1.61970  | 1.08090  | -1.46350 | C                         | 0.33520  | 1.82130  | -1.08610 |
| H | 2.46850  | 2.77520  | 0.17310  | C                         | 4.28840  | -1.25560 | -0.39600 |
| H | 1.77760  | 1.83140  | 1.49670  | C                         | -4.56720 | -1.26490 | -1.20970 |
| H | -2.47450 | -3.71470 | -0.44400 | C                         | -4.04530 | 0.04960  | 0.73090  |
| H | -0.51210 | -2.21490 | -0.54450 | C                         | 0.36090  | 2.85520  | 0.01700  |
| H | -4.25190 | 1.84170  | -0.18680 | C                         | 5.12980  | -0.30790 | 0.43450  |
| H | -3.49830 | -1.67810 | 2.11690  | C                         | -5.88510 | -0.81590 | -1.17660 |
| H | -5.23430 | -1.83900 | 1.76260  | C                         | -5.35700 | 0.51440  | 0.77110  |
| H | -4.19780 | -3.28050 | 1.84700  | C                         | -0.63730 | 3.64430  | 0.43950  |
| H | -5.06070 | -3.87190 | -0.55430 | C                         | -6.28200 | 0.07810  | -0.18190 |

|   |          |          |          |                  |          |          |          |
|---|----------|----------|----------|------------------|----------|----------|----------|
| C | 6.22320  | 0.37850  | 0.05640  | <b>Quercetin</b> |          |          |          |
| C | -0.41170 | 4.64070  | 1.55190  | O                | 0.29390  | 0.72810  | -0.18150 |
| C | -2.03560 | 3.64890  | -0.12450 | O                | -0.35580 | -2.81550 | 0.35850  |
| C | 6.94520  | 1.26960  | 1.03750  | O                | 4.56730  | -1.45430 | 0.22800  |
| C | 6.84850  | 0.32380  | -1.31540 | O                | 2.33730  | -2.76600 | 0.34660  |
| H | -2.05840 | -1.90350 | -1.24160 | O                | 4.25550  | 3.21510  | -0.34740 |
| H | -2.53530 | -3.21730 | 0.83910  | O                | -4.45510 | 2.11750  | 0.96830  |
| H | -2.05000 | -1.82670 | 1.81440  | O                | -5.96230 | 0.29650  | -0.29820 |
| H | 0.96100  | 2.17620  | -1.91190 | C                | 2.40620  | -0.41930 | 0.02940  |
| H | -0.67220 | 1.68980  | -1.47750 | C                | 1.65820  | 0.76330  | -0.13480 |
| H | 4.56060  | -2.27970 | -0.11130 | C                | -0.38270 | -0.44720 | -0.06220 |
| H | 4.56080  | -1.18820 | -1.45420 | C                | -1.83880 | -0.26780 | -0.12960 |
| H | -4.26510 | -1.95310 | -1.99260 | C                | 0.27060  | -1.63360 | 0.14910  |
| H | -3.33510 | 0.40170  | 1.47000  | C                | 1.72660  | -1.69630 | 0.18200  |
| H | 1.32790  | 2.96430  | 0.50400  | C                | 3.84920  | -0.33610 | 0.06680  |
| H | 4.79160  | -0.19180 | 1.46250  | C                | 2.25830  | 1.99850  | -0.26590 |
| H | 3.31460  | -3.26750 | 0.53550  | C                | 3.70890  | 2.09340  | -0.23150 |
| H | 3.95640  | 1.06260  | -0.74850 | C                | -2.42630 | 0.86450  | 0.46590  |
| H | -6.60820 | -1.14180 | -1.91410 | C                | 4.47340  | 0.88090  | -0.06170 |
| H | -5.66230 | 1.21540  | 1.54250  | C                | -2.66640 | -1.18820 | -0.79310 |
| H | 0.61540  | 4.61160  | 1.92240  | C                | -3.79650 | 1.05270  | 0.41150  |
| H | -0.62410 | 5.66280  | 1.21410  | C                | -4.04500 | -0.99390 | -0.84610 |
| H | -1.08550 | 4.44640  | 2.39590  | C                | -4.62140 | 0.11900  | -0.24260 |
| H | -2.20530 | 2.87060  | -0.86740 | H                | 1.67870  | 2.90220  | -0.39800 |
| H | -2.77230 | 3.51430  | 0.67640  | H                | -1.80230 | 1.59150  | 0.97370  |
| H | -2.25810 | 4.61730  | -0.58990 | H                | 5.55270  | 0.95100  | -0.03640 |
| H | 6.45800  | 1.28100  | 2.01430  | H                | -2.23510 | -2.02970 | -1.32200 |
| H | 7.98020  | 0.93470  | 1.17370  | H                | -4.68660 | -1.69170 | -1.36950 |
| H | 6.99750  | 2.29940  | 0.66570  | H                | -1.30290 | -2.66920 | 0.48350  |
| H | 6.28190  | -0.26910 | -2.03320 | H                | 3.92850  | -2.20880 | 0.30920  |
| H | 6.96850  | 1.33320  | -1.72470 | H                | -3.83480 | 2.72490  | 1.38540  |
| H | 7.85540  | -0.10500 | -1.25050 | H                | -6.19020 | 1.11860  | 0.15700  |
| H | -7.73310 | 1.10980  | 0.53750  |                  |          |          |          |

**Ascorbic acid**

|   |          |          |          |
|---|----------|----------|----------|
| O | -0.68290 | -1.38130 | -0.59330 |
| O | 2.55170  | -0.03560 | -1.27750 |
| O | -0.05380 | 2.15370  | -0.52690 |
| O | 3.13190  | -0.28150 | 1.43310  |
| O | -2.76880 | 1.26250  | 0.69160  |
| O | -2.73400 | -1.62560 | 0.38190  |
| C | 0.17210  | -0.26880 | -0.93060 |
| C | 1.57610  | -0.54510 | -0.36440 |
| C | -0.54860 | 1.01050  | -0.42430 |
| C | 1.78420  | 0.04980  | 1.01850  |
| C | -1.74630 | 0.53200  | 0.10410  |
| C | -1.83100 | -0.87320 | 0.01070  |
| H | 0.26840  | -0.22780 | -2.02050 |
| H | 1.68390  | -1.63680 | -0.29660 |
| H | 1.65340  | 1.13330  | 0.96800  |
| H | 1.05810  | -0.37840 | 1.71720  |
| H | 3.37960  | 0.00560  | -0.78360 |
| H | 3.39050  | 0.33850  | 2.11980  |
| H | -3.42570 | 0.59700  | 0.94060  |
